# Supplementary material
Source: PubMed Central journal article supplement (PMC3778934)
Supplement: NIHMS449605-supplement-1.pdf [file NIHMS449605-supplement-1.pdf]

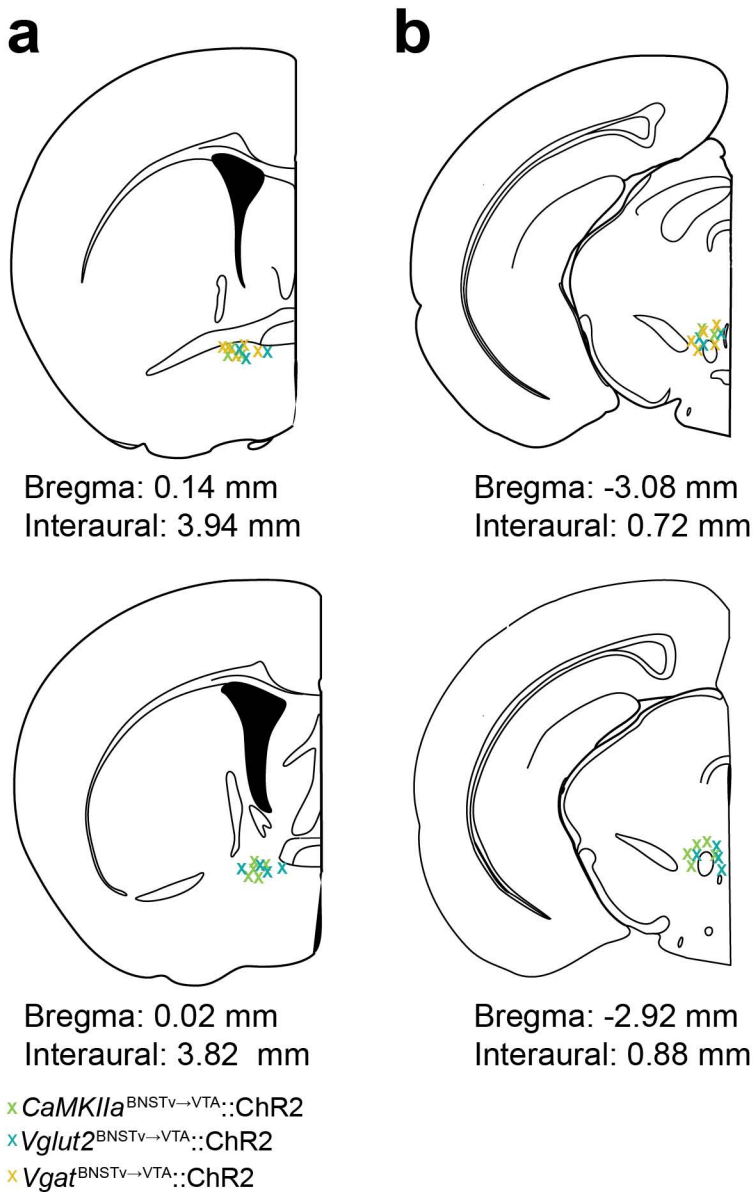

**Supplementary Figure 1. Recording sites and optical fiber placements for optogenetic identification of BNSTv→VTA projection neurons. a - b.** Location of multielectrode arrays within the BNSTv (a) and optical fibers within the VTA (b) based on histological examination of brain tissue following the experiments.

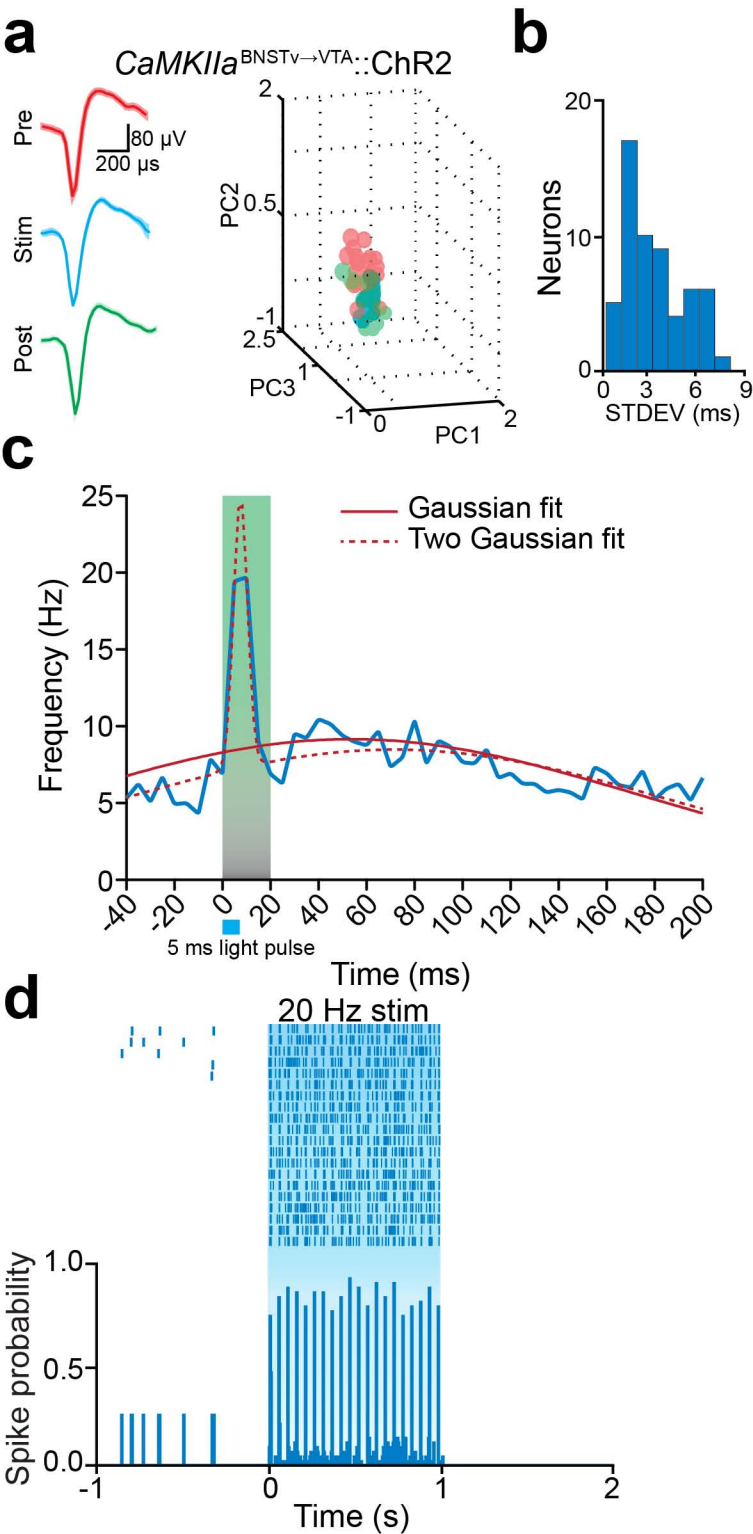

**Supplementary Figure 2. Optogenetic identification of *CaMKIIa*<sup>BNSTV→VTA</sup> projection neurons in freely moving mice.** **a.** Photostimulation does not alter recorded waveform shape during freely moving recordings ( $n = 53$  units,  $n = 7$  mice; PC: principle components, colored circles indicate waveform recorded during pre, during, or post stimulation epochs). **b.** Standard deviation (STDEV) spike latency after photostimulation for all identified projection neurons shown in Fig. 1j. **c.** Kolmogorov-Smirnov test for goodness of fit revealed the spike rate following antidromic photostimulation was not normally distributed ( $P < 0.0001$ ;  $n = 53$  units). Consistent with this, the data did not reliably fit a Gaussian distribution ( $R^2 = 0.2025$ ), but was better encapsulated by a bimodal distribution using a sum of two Gaussian fit ( $R^2 = 0.8510$ ). The two Gaussian model revealed distinct peaks in the fitted data occurring at  $t = 7.54$  ms and  $t = 70.55$  ms after the photostimulation onset. The peak occurring at 7.54 ms is indicative of antidromic photostimulation, while the latter peak could represent transynaptic activity. **d.** Representative peri-event histogram and raster of a single unit responding reliably to high frequency antidromic photostimulation (5 ms pulse duration, 20 Hz, 1 s trial duration).

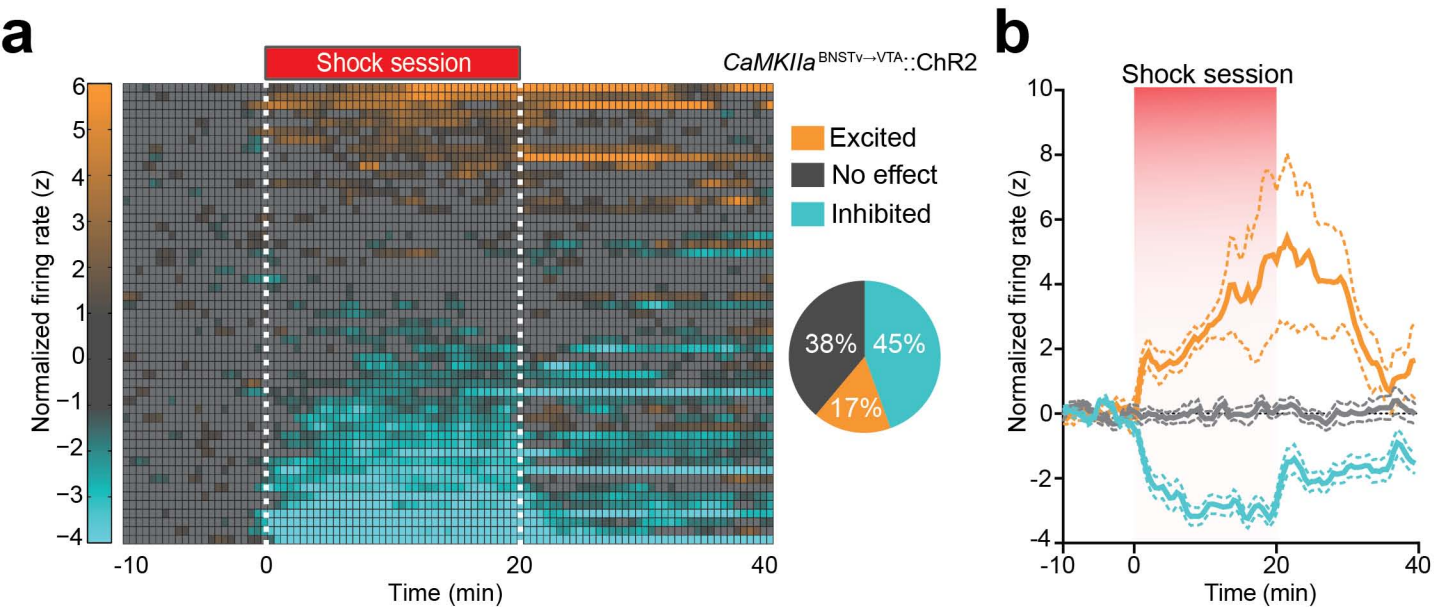

**Supplementary Figure 3. BNSTv→VTA projection neurons differentially respond to aversive stimuli.** **a.** Color plot and pie chart showing the normalized firing rates and classifications of all light responsive *CaMKIIa*<sup>BNSTv→VTA</sup> projection neurons ( $n = 53$ ) during the foot-shock session. **b.** Average normalized firing rate of all classified *CaMKIIa*<sup>BNSTv→VTA</sup> projection neurons are significantly altered during and following the foot-shock session ( $F_{200, 5052} = 7.21$ ,  $P < 0.0001$ ). All values are  $\pm$  s.e.m.

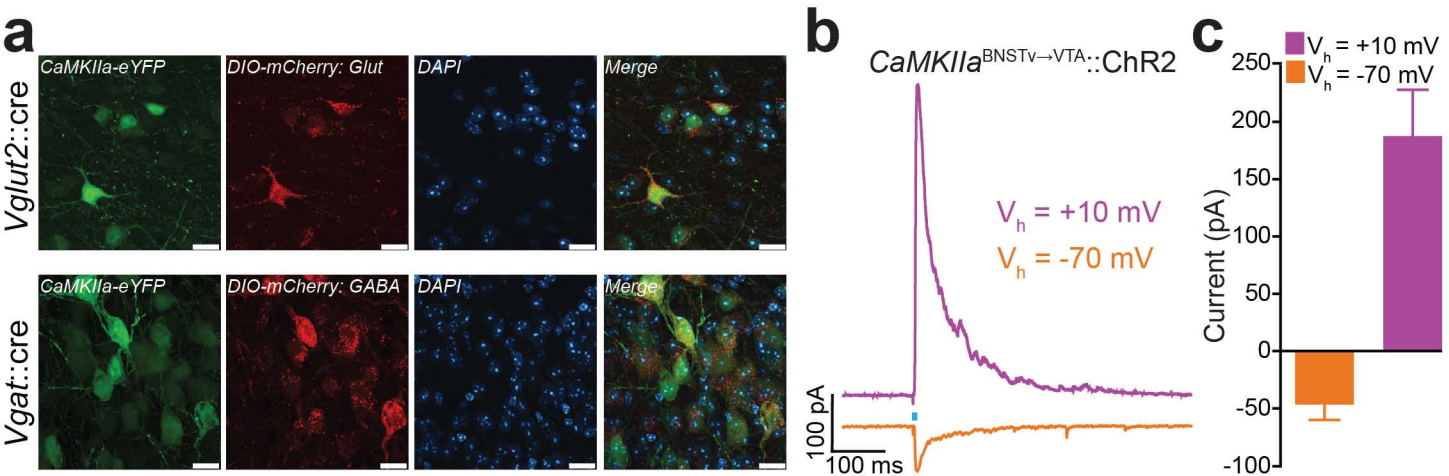

**Supplementary Figure 4. Neurochemically distinct BNSTv cell types contain CaMKIIa and form functional excitatory and inhibitory synapses onto VTA neurons.** **a.** AAV5-CaMKIIa-eYFP expression in both BNSTv-glutamatergic (top) and -GABAergic (bottom) neurons (scale bars = 20  $\mu\text{m}$ ). **b - c.** *CaMKIIa*<sup>BNSTv→VTA::ChR2</sup> photostimulation resulted in inward currents at  $V_h = -70 \text{ mV}$  and outward currents at  $V_h = +10 \text{ mV}$  in VTA neurons ( $n = 11$ ).

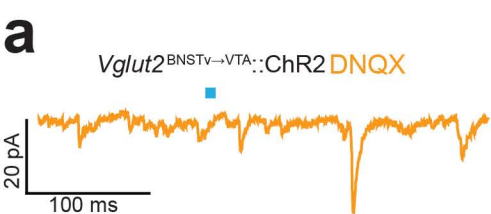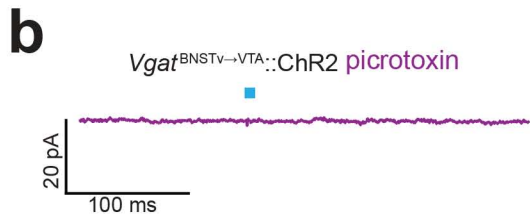

**Supplementary Figure 5. Photostimulation of  $Vglut2^{BNSTv \rightarrow VTA}::ChR2$  and  $Vgat^{BNSTv \rightarrow VTA}::ChR2$  pathways produces excitatory and inhibitory currents respectively in VTA neurons. a.** Current recorded from VTA neurons after photostimulation of  $Vglut2^{BNSTv \rightarrow VTA}::ChR2$  terminals after bath application of 10  $\mu$ m DNQX with a cesium chloride internal solution, optimized to detect GABAergic mediated currents. 0/20 neurons exhibited timelocked responses to LED stimulation. However, spontaneous IPSCs are still detectable. **b.** Current recorded from VTA neurons after photostimulation of  $Vgat^{BNSTv \rightarrow VTA}::ChR2$  terminals after bath application of 10  $\mu$ m picrotoxin with a cesium methanesulfonate internal solution, optimized to detect glutamatergic mediated currents. 0/20 neurons exhibited timelocked responses to LED stimulation. All neurons were held at -70 mV.

## Colocalized

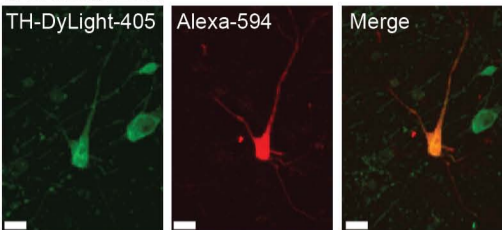

## Non-colocalized

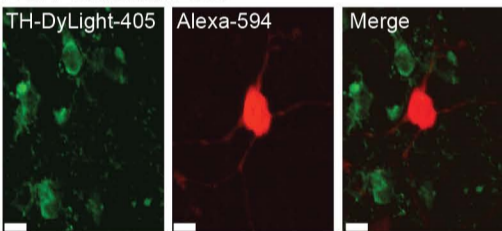

**Supplementary Figure 6. Postsynaptic labeling of VTA neurons.** Example confocal images of a non light-responsive TH+, VTA dopaminergic neuron (top) and a light-responsive nondopaminergic neuron (bottom) (scale bars = 20  $\mu$ m).

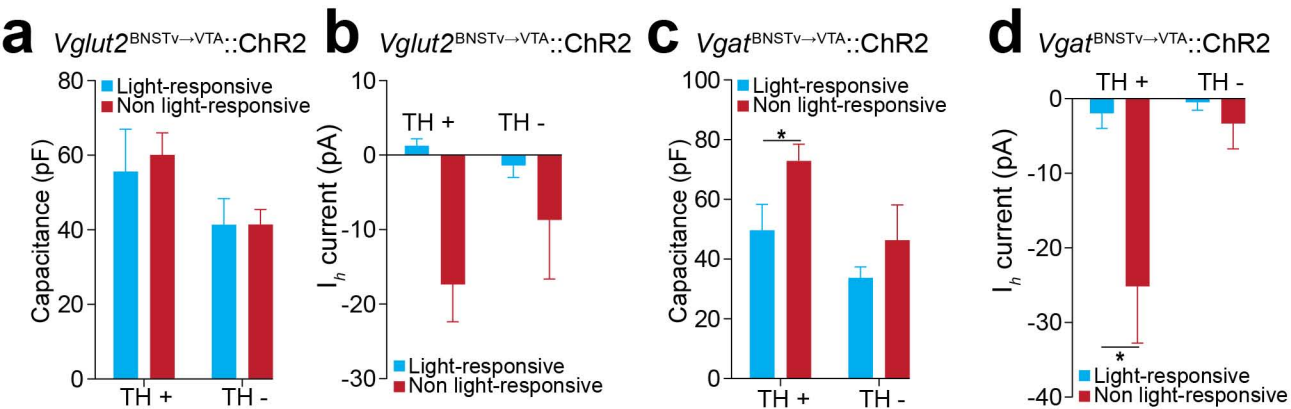

**Supplementary Figure 7. *Vglut2*<sup>BNSTv→VTA</sup> and *Vgat*<sup>BNSTv→VTA</sup> terminals synapse onto non-dopaminergic and  $I_h$  negative dopaminergic neurons in the VTA. a - d. Membrane capacitance (pF) and  $I_h$  currents (pA) recorded from light-responsive ( $n = 3 - 9$  cells per group) and non light-responsive ( $n = 16 - 26$  cells per group) VTA dopaminergic neurons and light-responsive ( $n = 7 - 14$  cells per group) and non light-responsive ( $n = 6 - 8$  cells per group) non-dopaminergic neurons in *Vglut2*<sup>BNSTv→VTA::ChR2</sup> and *Vgat*<sup>BNSTv→VTA::ChR2</sup> mice. Whole-cell voltage-clamp recordings from VTA dopaminergic neurons in *Vgat*<sup>BNSTv→VTA::ChR2</sup> mice show that light-responsive neurons have significantly lower membrane capacitance (c;  $P = 0.027$ ) as well as significantly lower  $I_h$  currents (d;  $P = 0.034$ ) compared to non light-responsive neurons. All values are  $\pm$  s.e.m. \*  $P < 0.05$ , \*\*  $P < 0.01$ .**

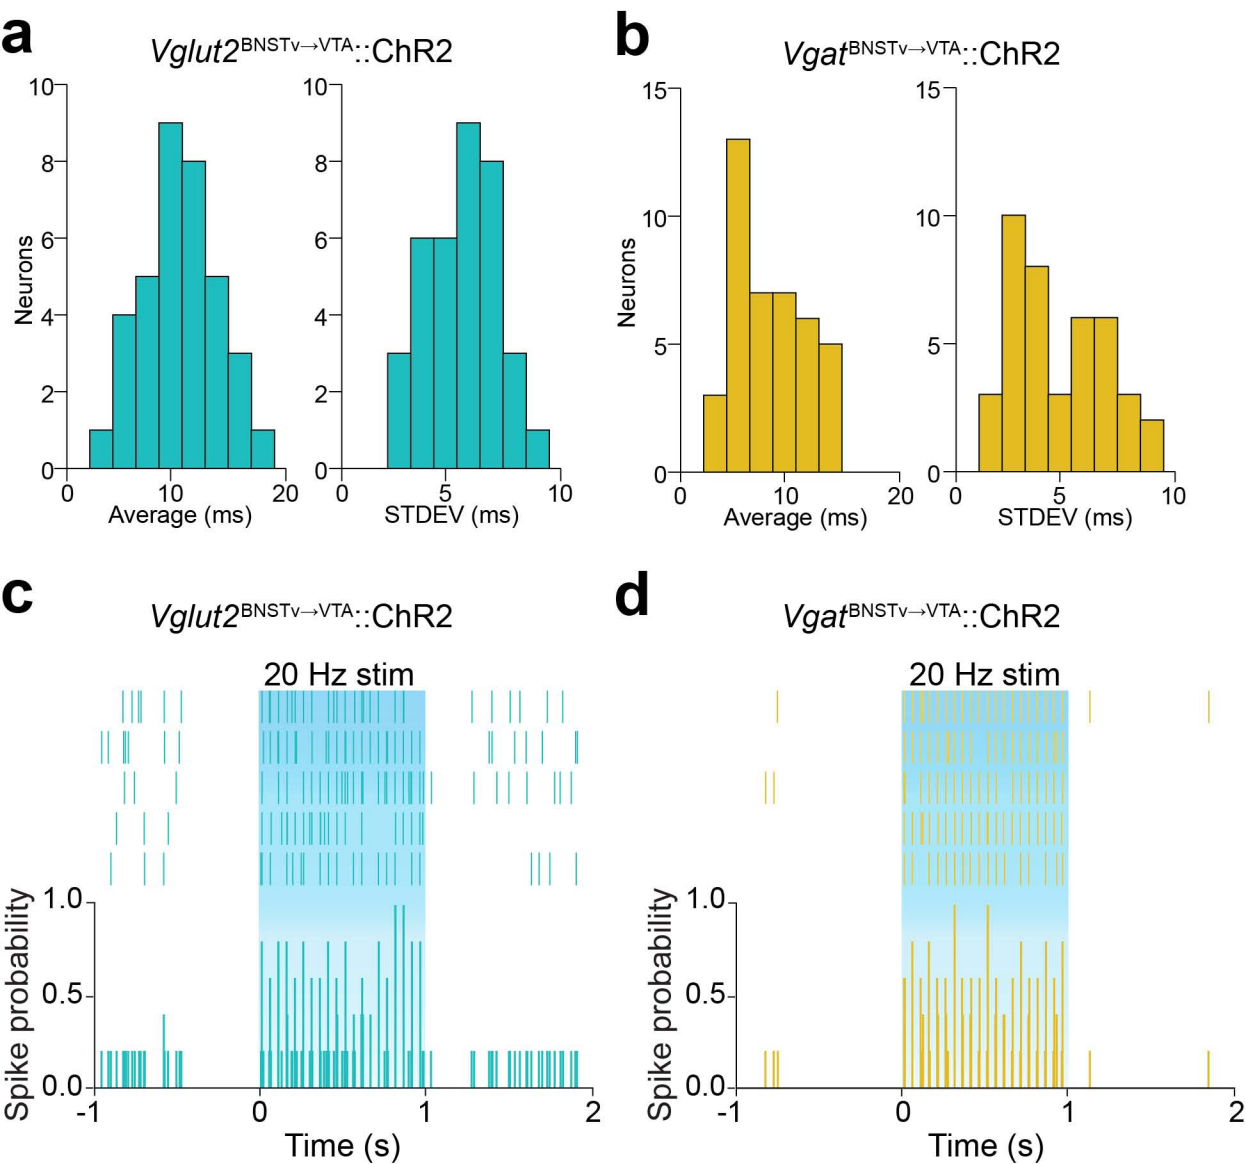

**Supplementary Figure 8. Optogenetic identification of *Vglut2*<sup>BNSTv→VTA</sup> and *Vgat*<sup>BNSTv→VTA</sup> projection neurons.** **a - b.** Mean spike latency (left) and standard deviation (STDEV; right) after 5 ms light-pulse delivery for all identified *Vglut2*<sup>BNSTv→VTA</sup> ( $n = 34$ ) and *Vgat*<sup>BNSTv→VTA</sup> ( $n = 33$ ) neurons in *Vglut2*<sup>BNSTv→VTA::ChR2</sup> (**a**) and *Vgat*<sup>BNSTv→VTA::ChR2</sup> (**b**) mice. **c - d.** Representative peri-event histogram and raster of a single unit from a *Vglut2*<sup>BNSTv→VTA::ChR2</sup> (**c**) and *Vgat*<sup>BNSTv→VTA::ChR2</sup> (**d**) mouse responding reliably to high frequency antidromic photostimulation (5 ms pulse duration, 20 Hz, 1 s trial duration).



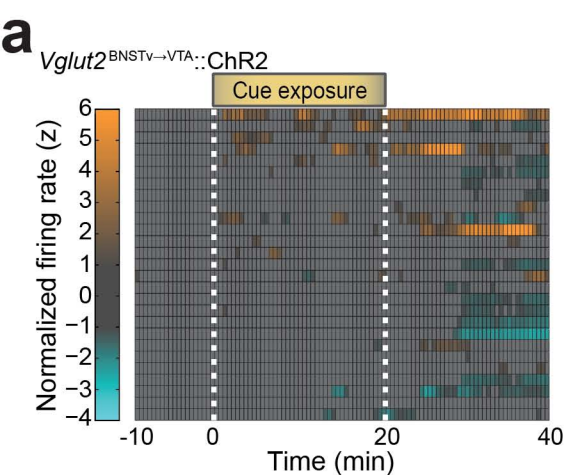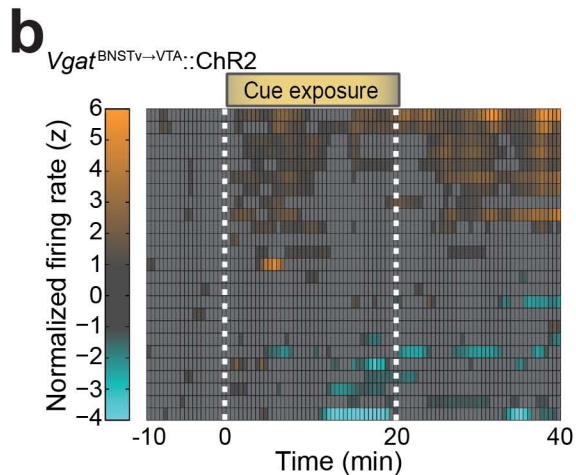

**Supplementary Figure 9. Auditory and visual contextual cue presentations prior to the first foot-shock session do not drastically alter firing patterns of identified  $Vglut2^{BNSTv \rightarrow VTA}$  and  $Vgat^{BNSTv \rightarrow VTA}$  neurons. a - b.** Color plots showing the normalized firing rate of  $n = 27$   $Vglut2^{BNSTv \rightarrow VTA}$  (a) and  $n = 26$   $Vgat^{BNSTv \rightarrow VTA}$  (b) neurons in response to unpaired auditory and visual contextual cue presentation ( $n = 4$  mice per group).

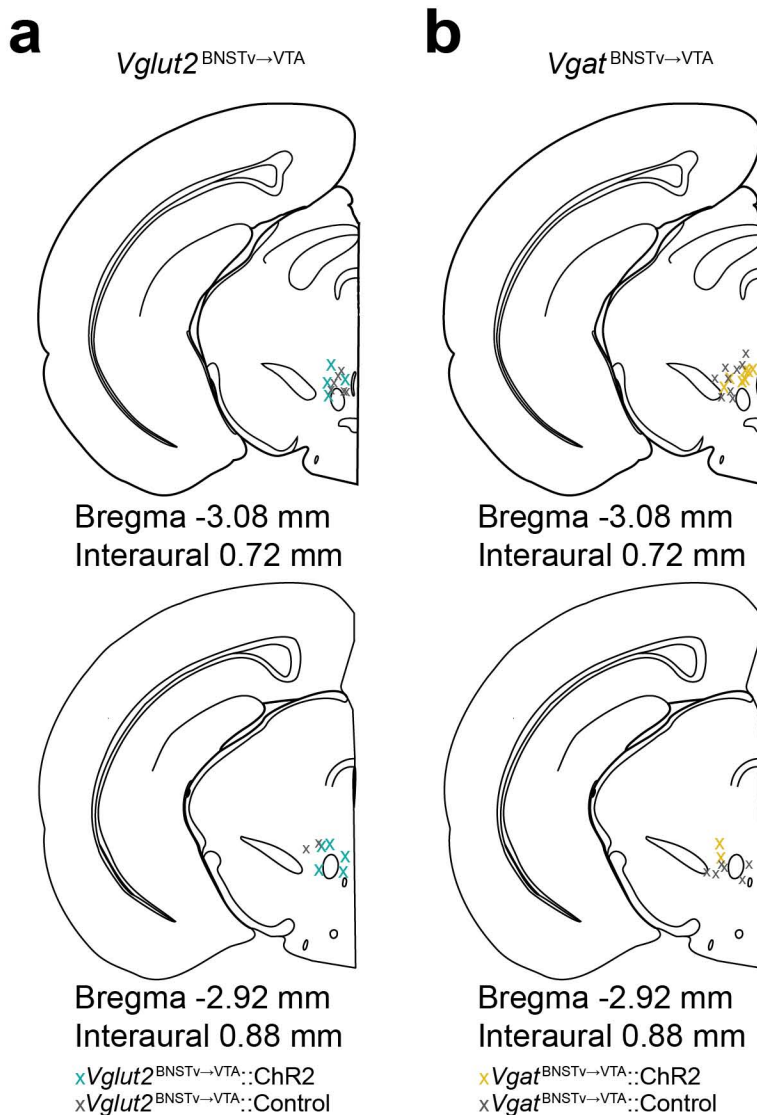

**Supplementary Figure 10. Optical fiber stimulation sites within the VTA. a - b.** Location of optical fibers within the VTA in the *Vglut2-ires-cre* mice (a) and the *Vgat-ires-cre* mice (b) based on histological examination of brain tissue following all behavioral experiments.

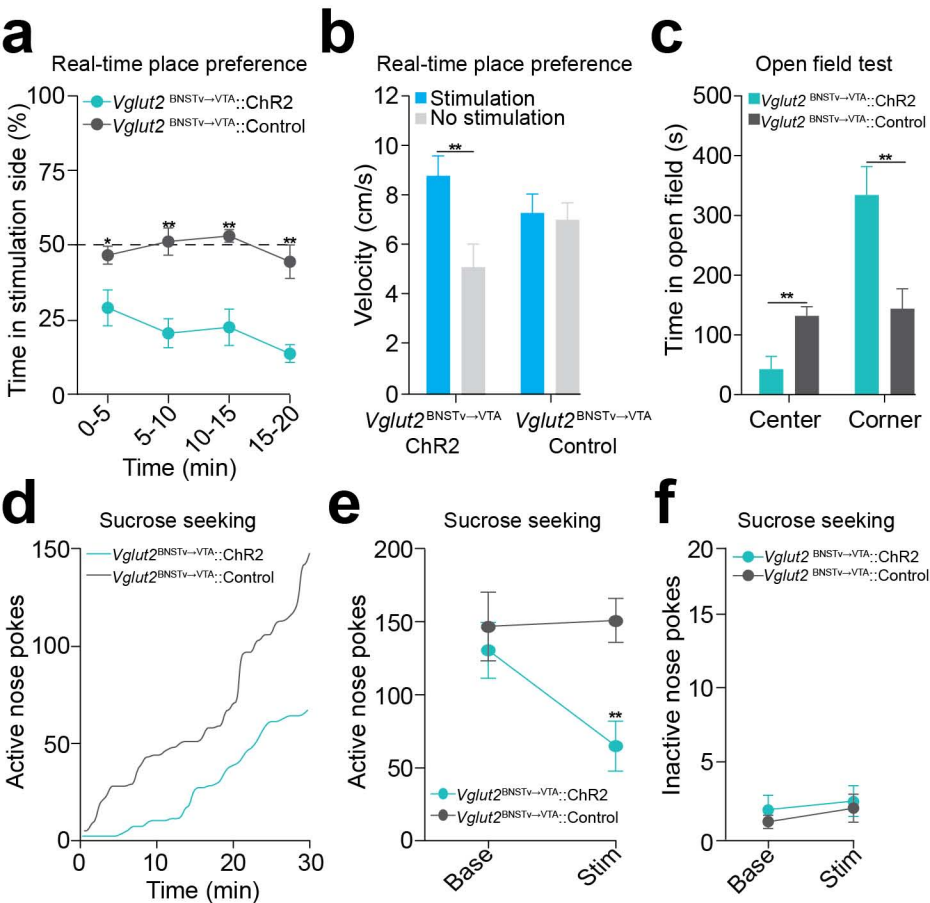

**Supplementary Figure 11. Photostimulation of the *Vglut2<sup>BNSTv->VTA</sup>* pathway promotes aversion and anxiety-like behavior.** **a.** *Vglut2<sup>BNSTv->VTA::ChR2</sup>* mice spent significantly less time in the stimulation side compared to *Vglut2<sup>BNSTv->VTA::Control</sup>* mice ( $F_{1,15} = 32.55$ ,  $P < 0.001$ ,  $n = 8$  mice per group). **b.** *Vglut2<sup>BNSTv->VTA::ChR2</sup>* mice exhibited an increase in movement velocity ( $P = 0.005$ ) in the stimulation side of a real-time place preference chamber. This effect was not observed in *Vglut2<sup>BNSTv->VTA::Control</sup>* mice ( $n = 8$  per group). **c.** Immediately following constant 20 Hz photostimulation of the *Vglut2<sup>BNSTv->VTA</sup>* pathway, *Vglut2<sup>BNSTv->VTA::ChR2</sup>* mice spent significantly less time in the center ( $P = 0.007$ ) and significantly more time in the corners ( $P = 0.008$ ) of an open-field chamber compared to *Vglut2<sup>BNSTv->VTA::Control</sup>* mice, indicating increased anxiety-like behavior ( $n = 6$  per group). **d.** Example cumulative records of active nose pokes made by representative *Vglut2<sup>BNSTv->VTA::ChR2</sup>* and *Vglut2<sup>BNSTv->VTA::Control</sup>* mice to obtain a sucrose reward during constant 20 Hz photostimulation. **e.** *Vglut2<sup>BNSTv->VTA::ChR2</sup>* mice made significantly fewer nose pokes for a sucrose reward during constant 20 Hz photostimulation when compared to *Vglut2<sup>BNSTv->VTA::Control</sup>* mice ( $F_{1,12} = 13.09$ ,  $P = 0.008$ ;  $n = 7$  mice per group). **f.** No significant differences were observed in inactive nose pokes between *Vglut2<sup>BNSTv->VTA::ChR2</sup>* and *Vglut2<sup>BNSTv->VTA::Control</sup>* mice in a sucrose nose-poking task during constant 20 Hz photostimulation ( $n = 7$  per group,  $P > 0.05$ ). All values are  $\pm$  s.e.m. \*  $P < 0.05$ , \*\*  $P < 0.01$ .

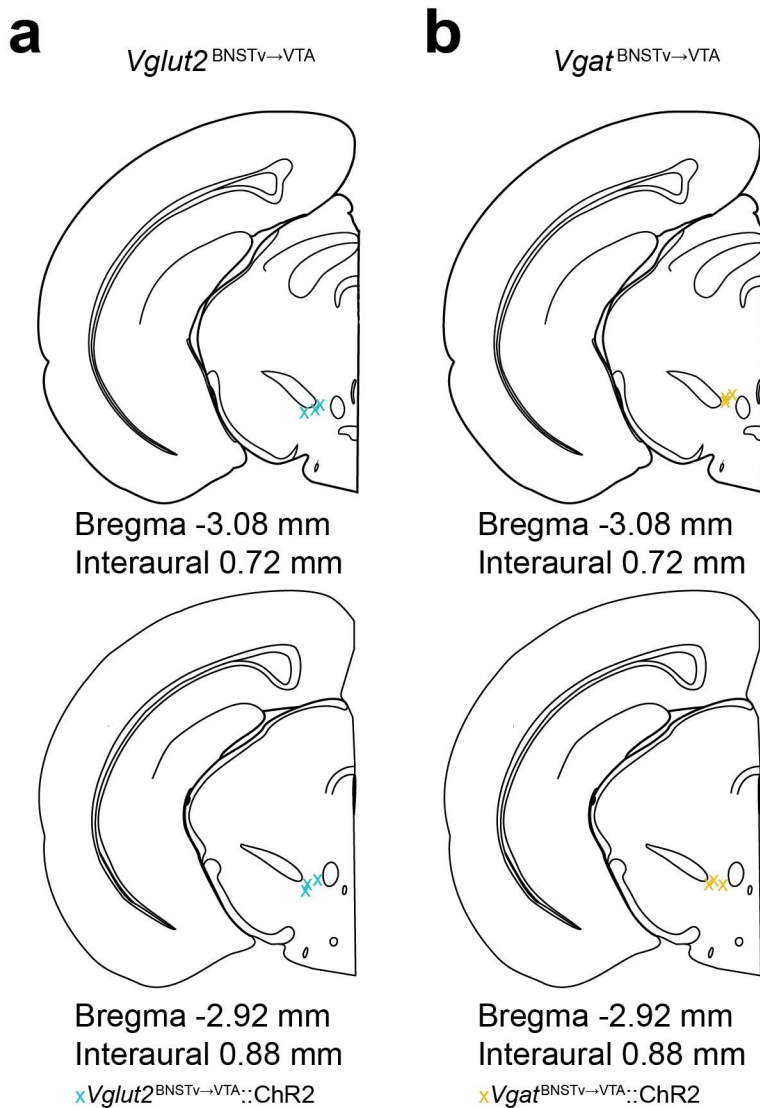

**Supplementary Figure 12. Optical fiber stimulation and cannula microinjection sites within the VTA. a - b.** Location of optical fibers and cannulae within the VTA in the  $Vglut2^{BNSTv \rightarrow VTA}::ChR2$  (a) and the  $Vgat^{BNSTv \rightarrow VTA}::ChR2$  (b) mice ( $n = 6$  per group) based on histological examination of brain tissue following all behavioral experiments.

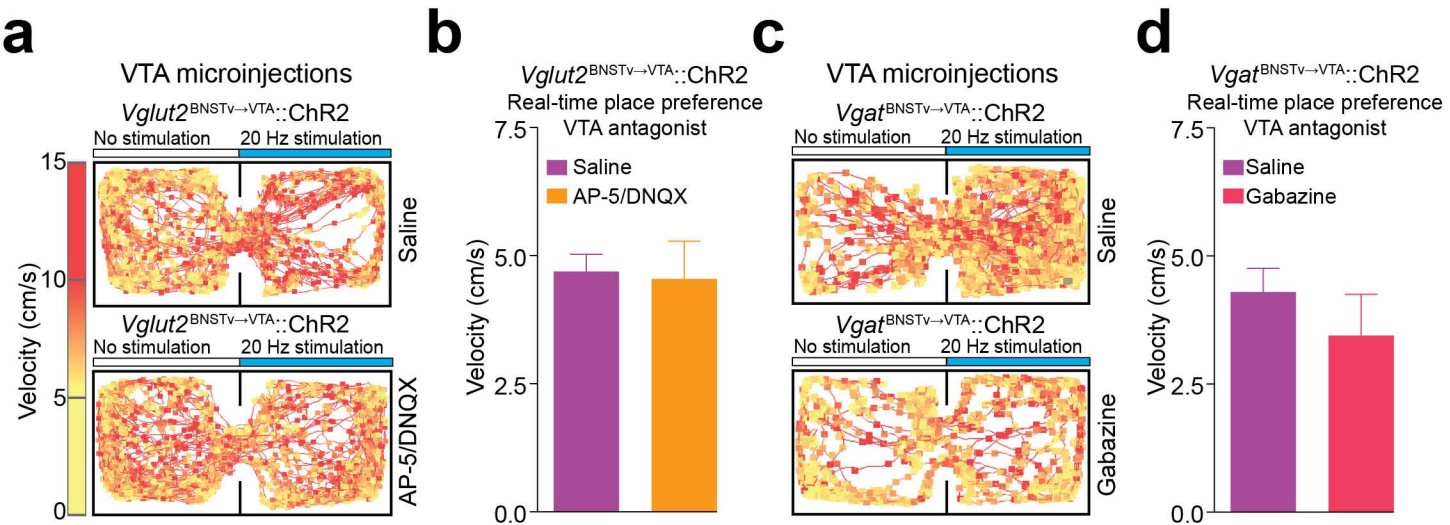

**Supplementary Figure 13. Intra-VTA infusions of antagonists followed by *Vglut2*<sup>BNSTv→VTA::ChR2</sup> pathway and *Vgat*<sup>BNSTv→VTA::ChR2</sup> pathway photostimulation does not alter movement velocity.**

**a.** Real-time place preference representative tracks from a *Vglut2*<sup>BNSTv→VTA::ChR2</sup> mouse after intra-VTA infusion of saline (top) and AP-5/DNQX (bottom). **b.** Intra-VTA infusions of AP-5/DNQX followed by *Vglut2*<sup>BNSTv→VTA::ChR2</sup> pathway stimulation does not alter movement velocity in a real-time place preference paradigm compared to intra-VTA saline infusions ( $n = 6$  mice). **c.** Real-time place preference representative tracks from a *Vgat*<sup>BNSTv→VTA::ChR2</sup> mouse after intra-VTA infusion of saline (top) and Gabazine (bottom). **d.** Intra-VTA infusions of Gabazine followed by *Vgat*<sup>BNSTv→VTA::ChR2</sup> pathway stimulation does not alter movement velocity in a real-time place preference paradigm compared to intra-VTA saline infusions ( $n = 6$  mice). All values are  $\pm$  s.e.m.

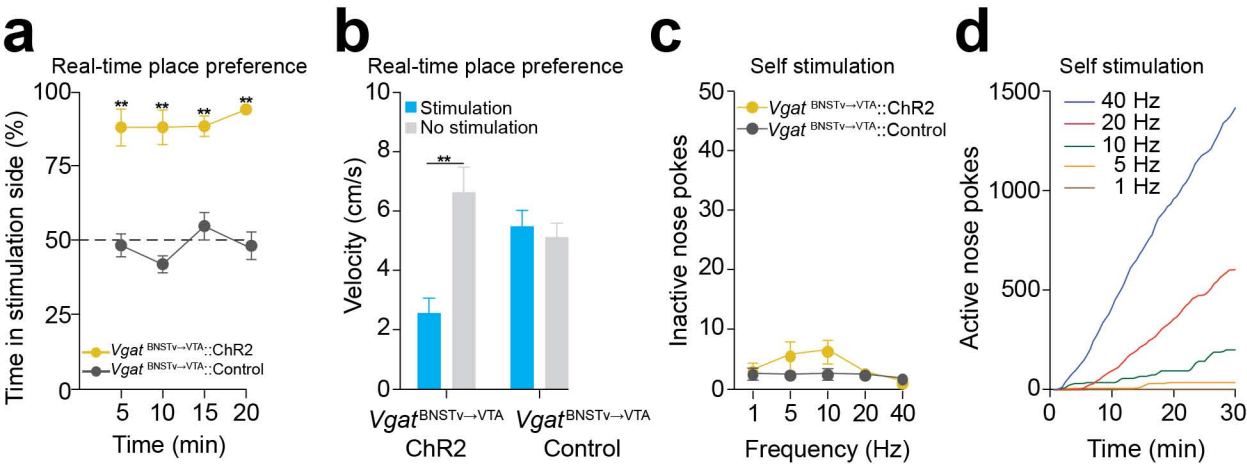

**Supplementary Figure 14. Photostimulation of the  $Vgat^{BNSTv \rightarrow VTA}$  pathway promotes reward-related behaviors.** **a.**  $Vgat^{BNSTv \rightarrow VTA::ChR2}$  mice spent significantly more time in the stimulation side when compared to  $Vgat^{BNSTv \rightarrow VTA::Control}$  mice ( $F_{1,13} = 89.56$ ,  $P < 0.001$ ;  $n = 7 - 8$  mice per group). **b.**  $Vgat^{BNSTv \rightarrow VTA::ChR2}$  mice exhibited a decrease in movement velocity ( $P = 0.004$ ) in the stimulation side of a real-time place preference chamber. This effect was not observed in  $Vgat^{BNSTv \rightarrow VTA::Control}$  mice ( $n = 7 - 8$  per group). **c.** No significant differences were observed for inactive nose pokes between  $Vgat^{BNSTv \rightarrow VTA::ChR2}$  and  $Vgat^{BNSTv \rightarrow VTA::Control}$  mice at all frequencies tested ( $n = 5 - 7$  per group,  $P > 0.05$ ). **d.** Example cumulative records of active nose pokes performed by a  $Vgat^{BNSTv \rightarrow VTA::ChR2}$  mouse to obtain photostimulation over a range of frequencies. All values are  $\pm$  s.e.m. \*\*  $P < 0.01$ .

*Vgat*<sup>VTA</sup>

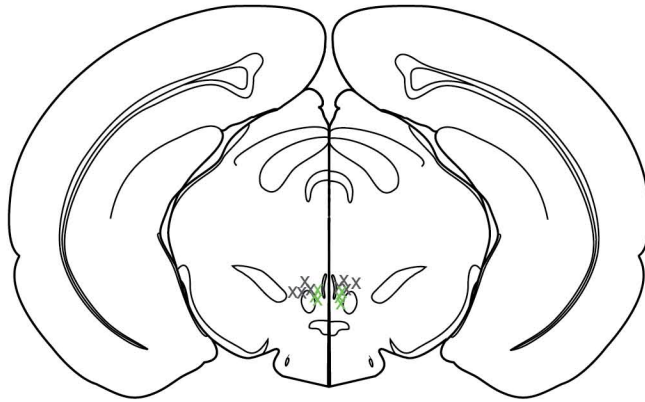

Bregma -3.08 mm  
Interaural 0.72 mm

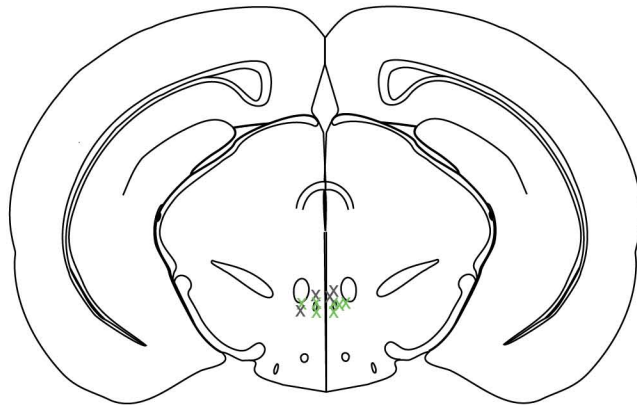

Bregma -2.92 mm  
Interaural 0.88 mm

x *Vgat*<sup>VTA</sup>::NpHR  
x *Vgat*<sup>VTA</sup>::Control

**Supplementary Figure 15. Optical fiber inhibition sites within the VTA.** Location of bilateral optical fibers within the VTA in *Vgat-ires-cre* mice ( $n = 6$  mice per group) based on histological examination of brain tissue following all behavioral experiments.

**a**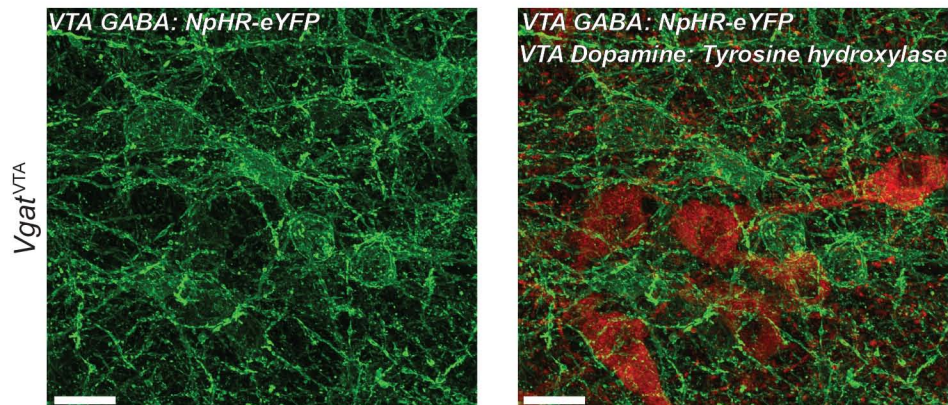**b**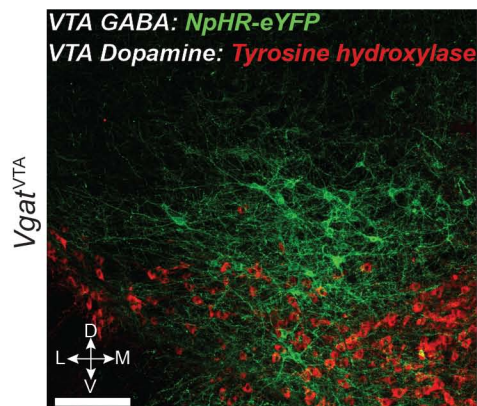**c**

Current-clamp recording from a *Vgat*<sup>VTA</sup> neuron

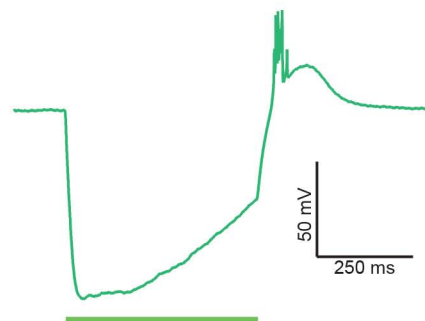

**Supplementary Figure 16. Photoinhibition of *Vgat*<sup>VTA</sup> neurons.** **a.** 63x confocal image showing expression of NpHR-eYFP (green) in *Vgat*<sup>VTA</sup> neurons (left) and tyrosine hydroxylase (TH) (right). (Scale = 20  $\mu$ m). **b.** 20x confocal image showing expression of NpHR-eYFP in *Vgat*<sup>VTA</sup> neurons following injection of the viral construct into the VTA, shown in green. VTA dopaminergic neurons, as indicated by TH immunoreactivity, are shown in red (D, dorsal; V, ventral; L, lateral; M, medial; Scale = 200  $\mu$ m). **c.** Example whole-cell current clamp recording showing robust membrane hyperpolarization after a 500 ms light pulse (532 nm) in a VTA neuron expressing NpHR. Average hyperpolarization of membrane =  $-52.95 \pm 11.95$  mV in  $n = 4$  neurons.



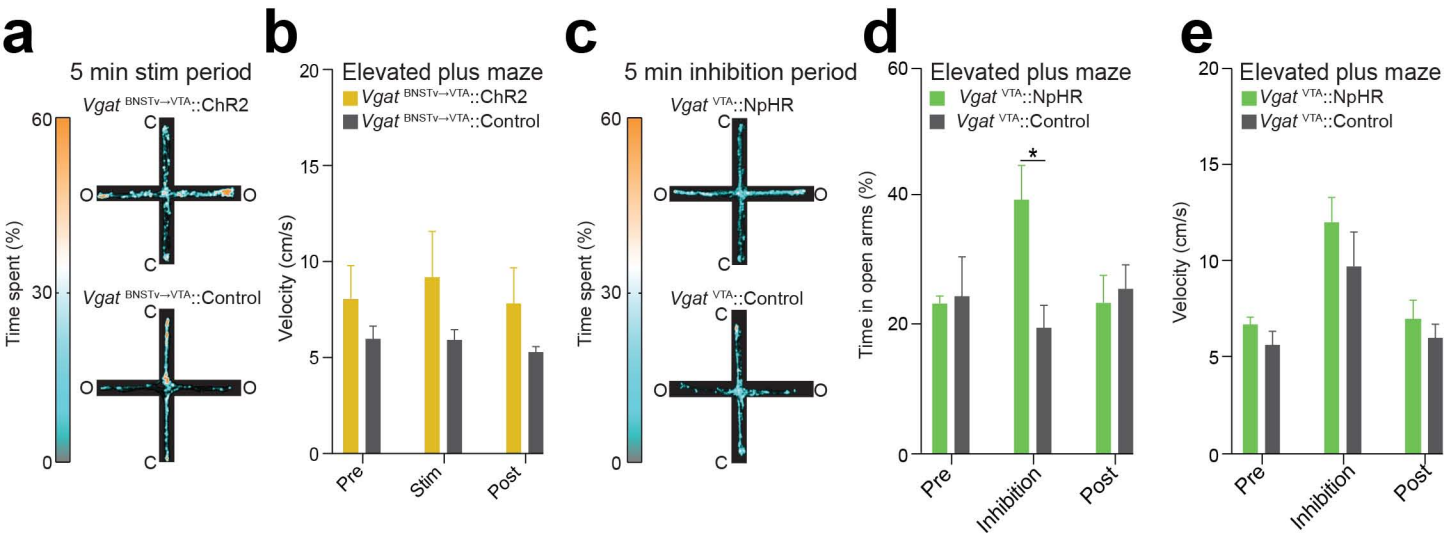

**Supplementary Figure 17. Photostimulation of the *Vgat*<sup>BNSTv→VTA</sup> pathway and photoinhibition of *Vgat*<sup>VTA</sup> neurons produces anxiolysis and does not alter movement velocity.** **a.** Representative heat maps displaying average time spent in the elevated plus maze during the 5 min photostimulation epoch from *Vgat*<sup>BNSTv→VTA::ChR2</sup> (top) and *Vgat*<sup>BNSTv→VTA::Control</sup> (bottom) mice (O, open arm; C, closed arm). **b.** No significant differences were observed in movement velocity between *Vgat*<sup>BNSTv→VTA::ChR2</sup> and *Vgat*<sup>BNSTv→VTA::Control</sup> mice ( $n = 7$  mice per group) during each time epoch on the elevated plus maze. **c.** Representative heat maps displaying average time spent in the elevated plus maze during the 5 min photoinhibition epoch from *Vgat*<sup>VTA::NpHR</sup> (top) and *Vgat*<sup>VTA::Control</sup> (bottom) mice. **d.** *Vgat*<sup>VTA::NpHR</sup> mice spent significantly more time in the open arms compared to *Vgat*<sup>VTA::Control</sup> mice ( $n = 5$  mice per group) during the 5 min photoinhibition epoch  $F_{2,16} = 10.519$ ,  $P < 0.01$ . **e.** No significant differences were observed in movement velocity between *Vgat*<sup>VTA::NpHR</sup> and *Vgat*<sup>VTA::Control</sup> mice ( $n = 5$  mice per group) during each time epoch on the elevated plus maze. All values are ± s.e.m. \*  $P < 0.05$ .

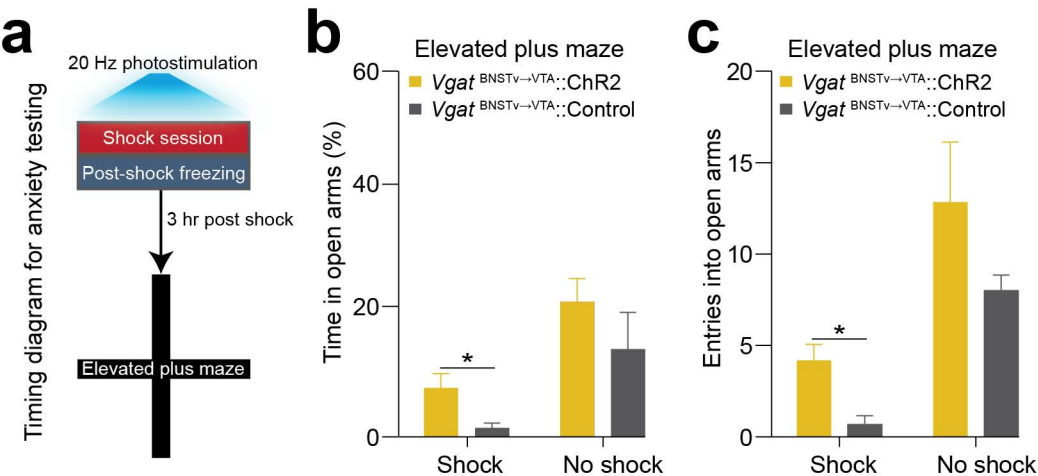

**Supplementary Figure 18. Photostimulation of the *Vgat*<sup>BNSTv→VTA</sup> pathway buffers stress-induced anxiety.** **a.** Schematic of shock-induced anxiety paradigm. **b - c.** 3 hr after shock exposure, *Vgat*<sup>BNSTv→VTA::ChR2</sup> mice spent significantly more time in the open arms ( $F_{1,20} = 12.822, P = 0.002, P = 0.03$ ) and made significantly more open-arm entries ( $F_{1,20} = 20.3771, P < 0.001, P = 0.008$ ) compared to *Vgat*<sup>BNSTv→VTA::Control</sup> mice ( $n = 6 - 7$  per group). Photostimulation in *Vgat*<sup>BNSTv→VTA::ChR2</sup> and *Vgat*<sup>BNSTv→VTA::Control</sup> mice in the absence of foot shock resulted in no significant differences. All values are  $\pm$  s.e.m. \*  $P < 0.05$ .

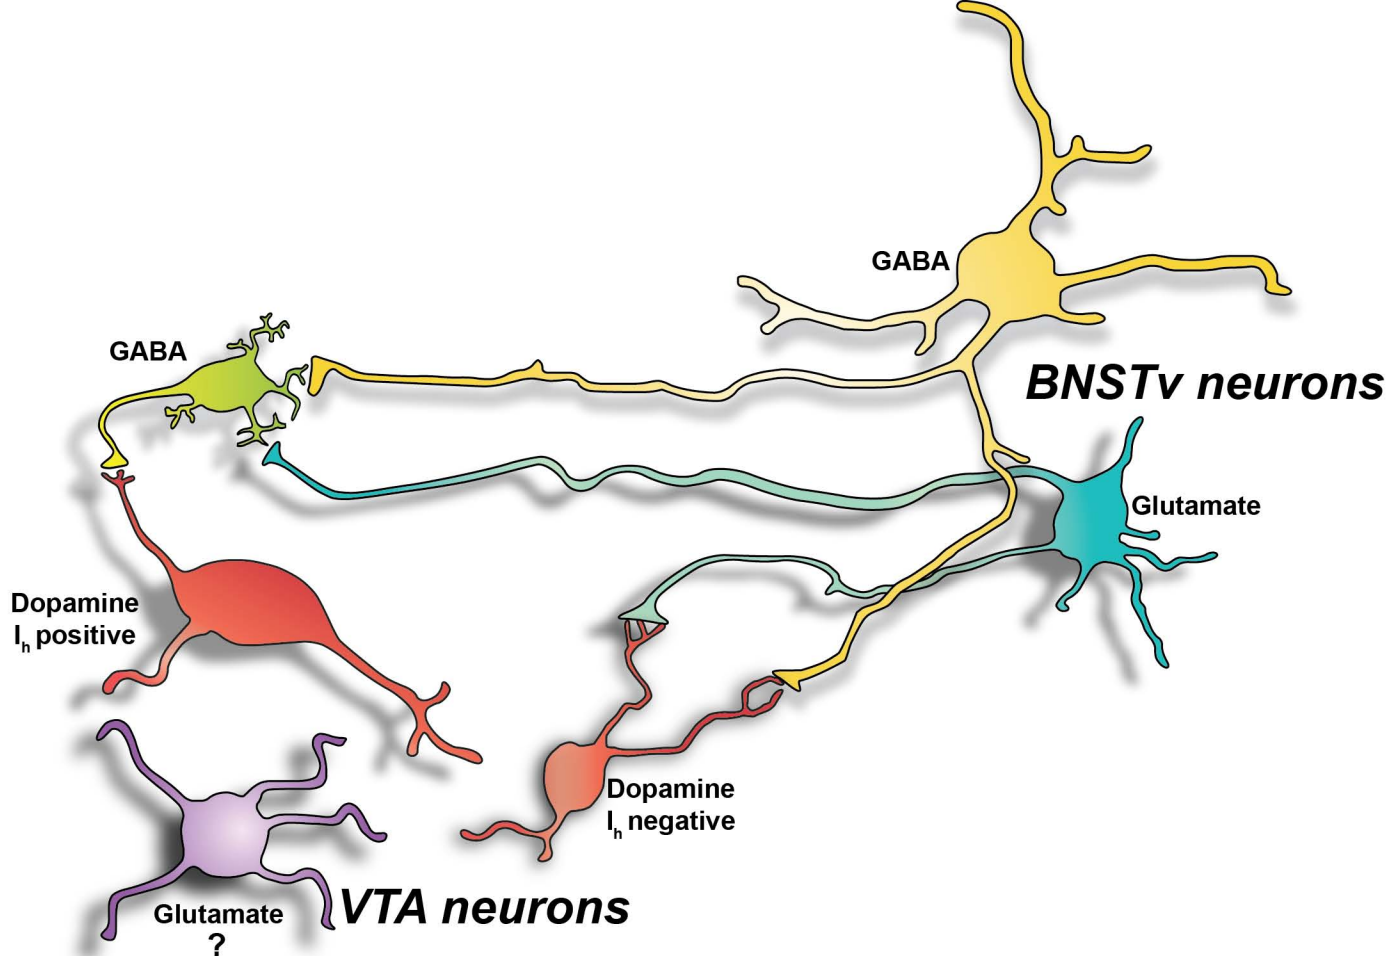

**Supplementary Figure 19. Genetically distinct BNSTv→VTA projections bidirectionally modulate discrete VTA neurons through indirect and direct mechanisms.** Summary schematic detailing how *Vgat*<sup>BNSTv→VTA</sup> and *Vglut2*<sup>BNSTv→VTA</sup> projection neurons regulate VTA circuit function through direct innervation as well as through indirect stimulation and inhibition of VTA dopaminergic neurons.

Table S1. Spontaneous waveform are highly correlated to light-evoked waveforms

*CaMKIIa*<sup>BNSTv→VTA</sup> projection neurons

| Analysis   | Waveform shape |             |             | Prinicpal component analysis |             |             |
|------------|----------------|-------------|-------------|------------------------------|-------------|-------------|
| Comparison | Pre/Stim       | Stim/Post   | Pre/Post    | Pre/Stim                     | Stim/Post   | Pre/Post    |
| <i>r</i>   | 0.95 ± 0.01    | 0.95 ± 0.01 | 0.95 ± 0.01 | 0.94 ± 0.02                  | 0.91 ± 0.03 | 0.93 ± 0.04 |

*n* = 53*Vglut2*<sup>BNSTv→VTA</sup> projection neurons

| Analysis   | Waveform shape |             |             | Prinicpal component analysis |             |             |
|------------|----------------|-------------|-------------|------------------------------|-------------|-------------|
| Comparison | Pre/Stim       | Stim/Post   | Pre/Post    | Pre/Stim                     | Stim/Post   | Pre/Post    |
| <i>r</i>   | 0.91 ± 0.01    | 0.90 ± 0.01 | 0.90 ± 0.01 | 0.92 ± 0.02                  | 0.92 ± 0.02 | 0.95 ± 0.01 |

*n* = 34*Vgat*<sup>BNSTv→VTA</sup> projection neurons

| Analysis   | Waveform shape |             |             | Prinicpal component analysis |             |             |
|------------|----------------|-------------|-------------|------------------------------|-------------|-------------|
| Comparison | Pre/Stim       | Stim/Post   | Pre/Post    | Pre/Stim                     | Stim/Post   | Pre/Post    |
| <i>r</i>   | 0.92 ± 0.01    | 0.92 ± 0.01 | 0.92 ± 0.01 | 0.94 ± 0.02                  | 0.91 ± 0.03 | 0.97 ± 0.01 |

*n* = 33
